# Supplementary material for: Substrate templated synthesis of single-phase and uniform Zr-porphyrin-based metal–organic frameworks
Source: Royal Society of Chemistry journal article supplement (doi:10.1039/c9qi01045a), 2019-10-24
Supplement: c9qi01045a1.pdf [file c9qi01045a1.pdf]

Electronic Supplementary Information

## **Substrate Templated Synthesis for Single-Phase and Uniform Zr-Porphyrin Based Metal Organic Frameworks**

Seong Won Hong<sup>[a]</sup>, Ju Won Paik<sup>[a,c]</sup>, Dongju Seo<sup>[a]</sup>, Jae-Min Oh<sup>\*[b]</sup>, Young Kyu Jeong<sup>\*[c]</sup>,  
Jin Kuen Park<sup>\*[a]</sup>

<sup>[a]</sup> Department of Chemistry, Hankuk University of Foreign Studies, Yongin, 17035,  
Gyeonggi-do, Republic of Korea, E-mail: [jinkpark@hufs.ac.kr](mailto:jinkpark@hufs.ac.kr).

<sup>[b]</sup> Department of Energy and Materials Engineering, Dongguk University-Seoul, Seoul  
04620, Republic of Korea, E-mail: [jaemin.oh@dongguk.edu](mailto:jaemin.oh@dongguk.edu).

<sup>[c]</sup> Korea Institute of Industrial Technology (KITECH), 137-41 Gwahakdanji-ro, Gangneung-  
si 25440 Republic of Korea, E-mail: [immrc80@gmail.com](mailto:immrc80@gmail.com).

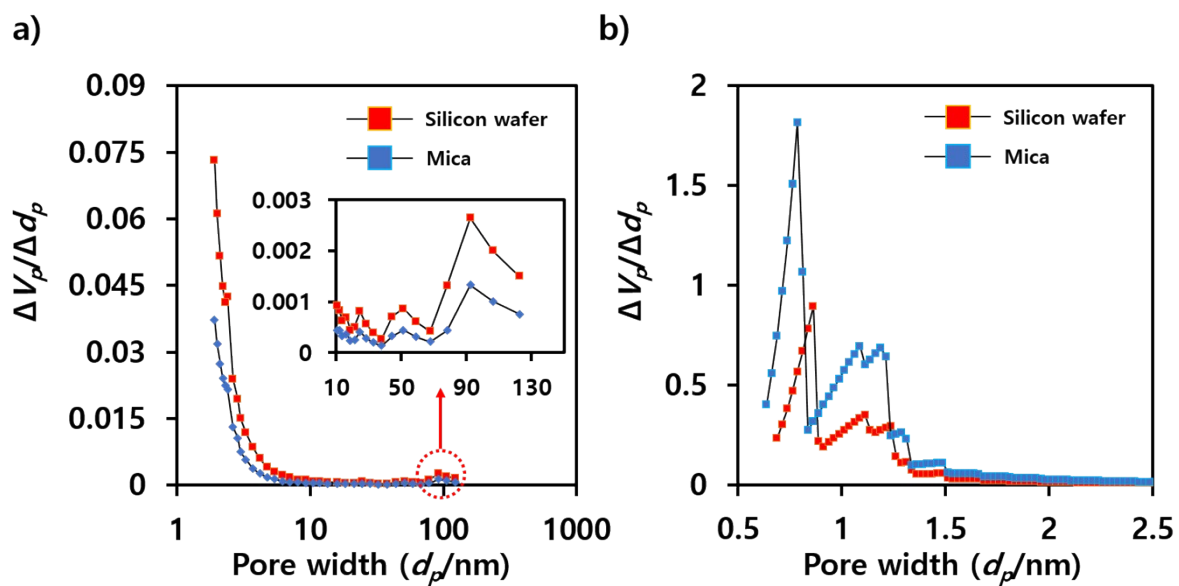

**Figure S1.** (a) Barret-Joyner-Halenda (BJH) pore size distribution of PCN-221 for mesopores and macropores and (b) Horváth-Kawazoe (HK) pore size distribution of PCN-221 for micropores obtained with silicon wafers and mica films.

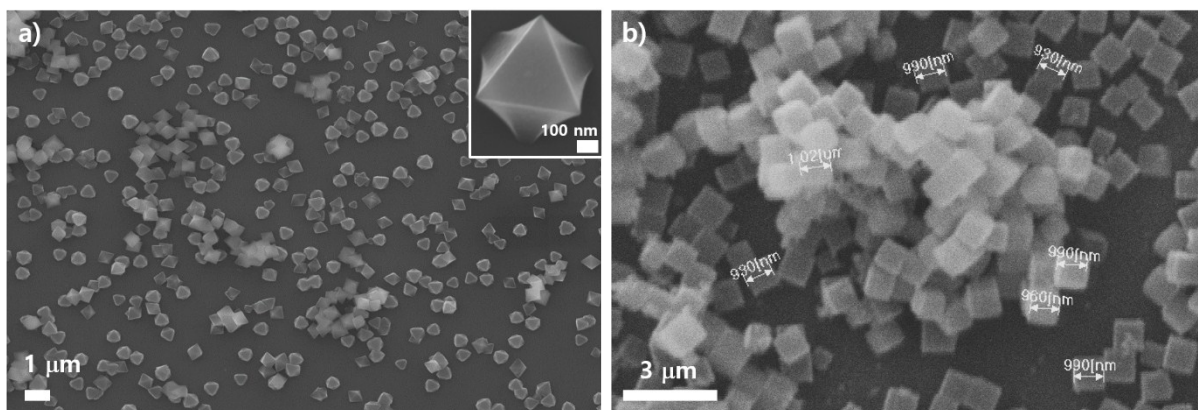

**Figure S2.** Scanning electron microscopy images of resulting products such as (a) UiO-66 and (b) MOF-525 on surfaces of silicon wafers using  $\text{ZrOCl}_2 \cdot 8\text{H}_2\text{O}$  at 120 °C with acetic acid as a modulator.
